# Supplementary material for: Controllable design of a macroporous PBA as an efficient non-enzymatic electrochemical sensor for glucose detection
Source: Royal Society of Chemistry journal article supplement (doi:10.1039/d3ce00593c), 2023-01-01
Supplement: d3ce00593c1.pdf [file d3ce00593c1.pdf]

## Supporting Information

### **Controllable design of macroporous PBA as an efficient non-enzymatic electrochemical sensor for glucose detection**

*Shuanglu Ying, Tian Liu, Yuxuan Kong, Qiao Jiang, Ning Chai, and Fei-Yan Yi\**

School of Materials Science and Chemical Engineering, Ningbo University, Ningbo, Zhejiang, 15211, P.

R. China, E-mail: [yifeiyan@nbu.edu.cn](mailto:yifeiyan@nbu.edu.cn)

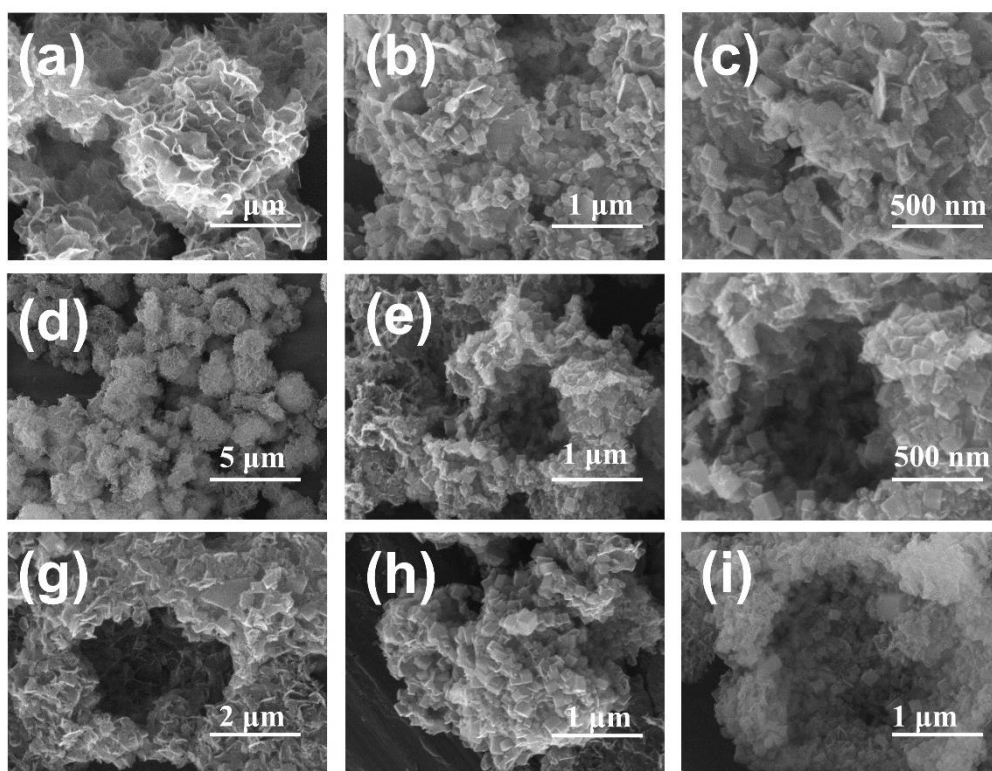

**Fig. S1** SEM of 0.03 HN-CoFePBA (a-c), 0.05 HN-CoFePBA(d-f), and 0.07 HN-CoFePBA(g-i).

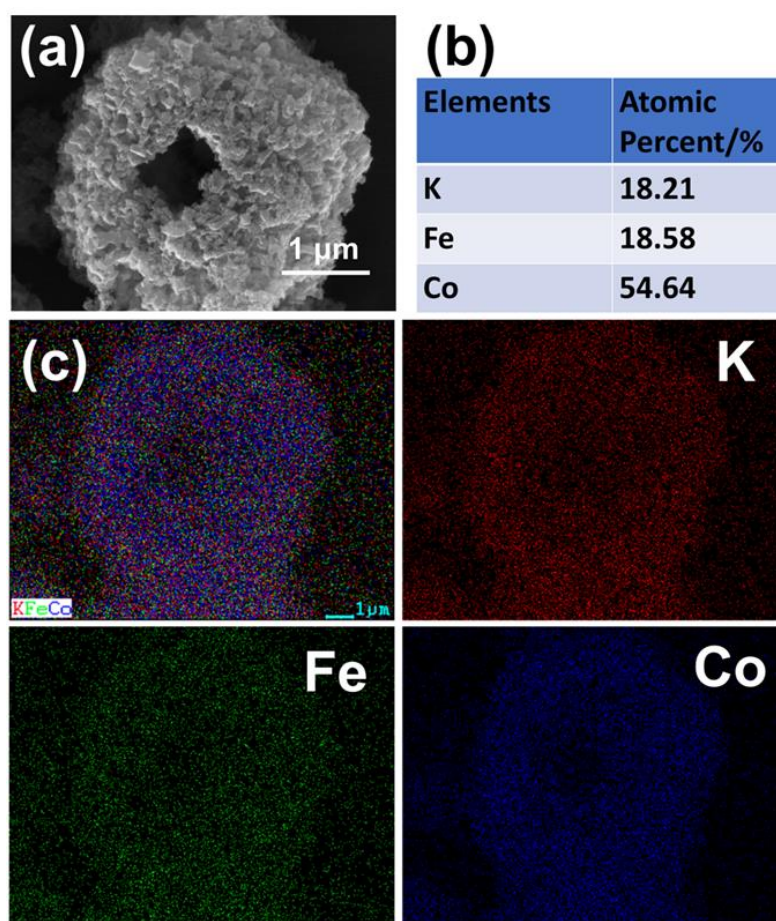

**Fig. S2** EDS elemental mapping images of K, Fe and Co of HN-CoFePBA.

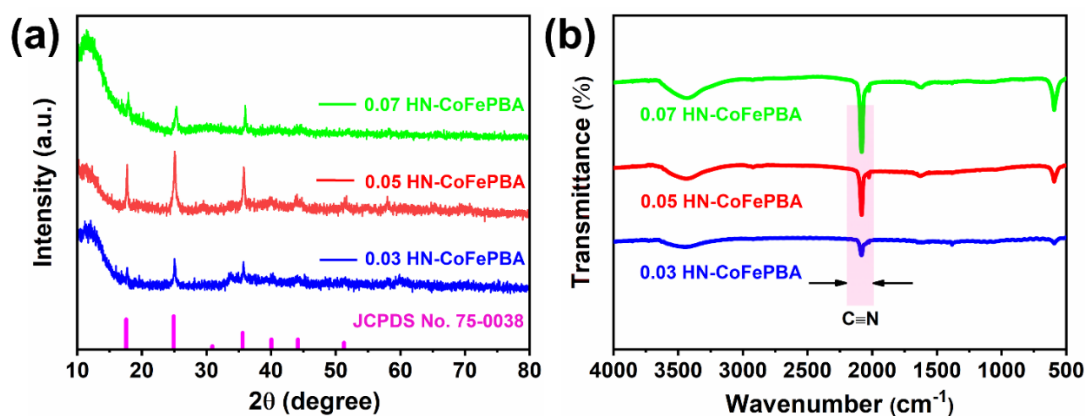

**Fig. S3** (a) XRD patterns of 0.03 HN-CoFePBA, 0.05 HN-CoFePBA and 0.07 HN-CoFePBA composites, (b) FT-IR spectra of 0.03 HN-CoFePBA, 0.05 HN-CoFePBA and 0.07 HN-CoFePBA composites.

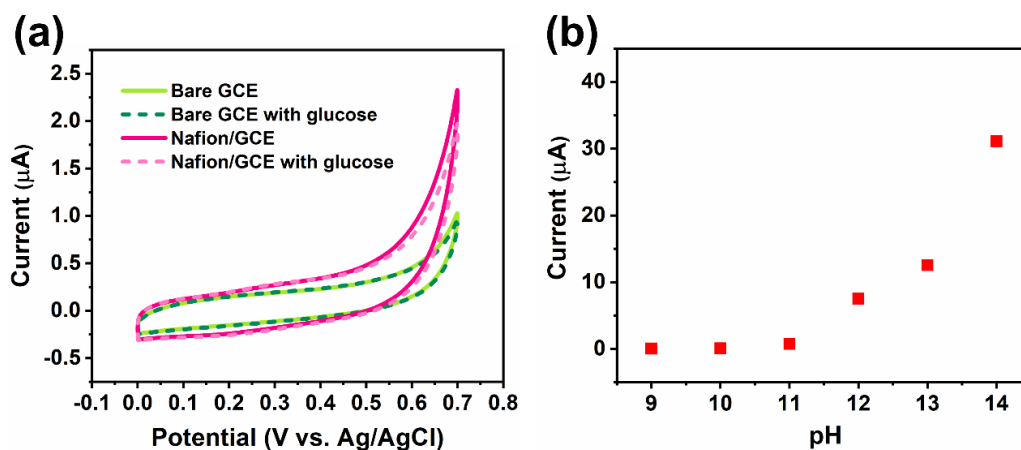

**Fig. S4** (a) CV curves of bare GCE, nafion/GCE in 0.1 M NaOH solution with or without 20  $\mu\text{M}$  glucose. (b) Plot of current vs. pH values for HN-CoFePBA electrode with 50  $\mu\text{M}$  glucose.

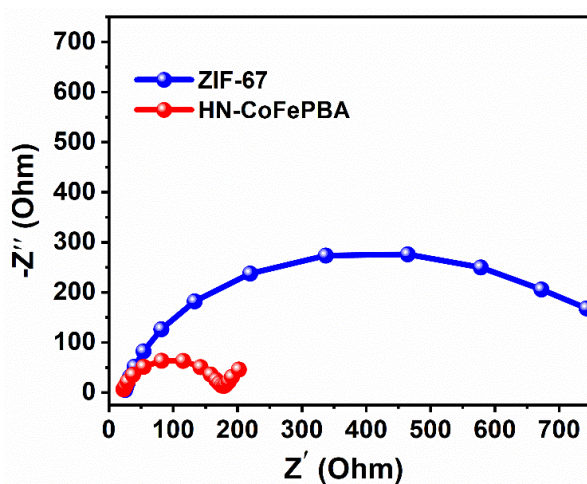

**Fig. S5** EIS Nyquist plots recorded.

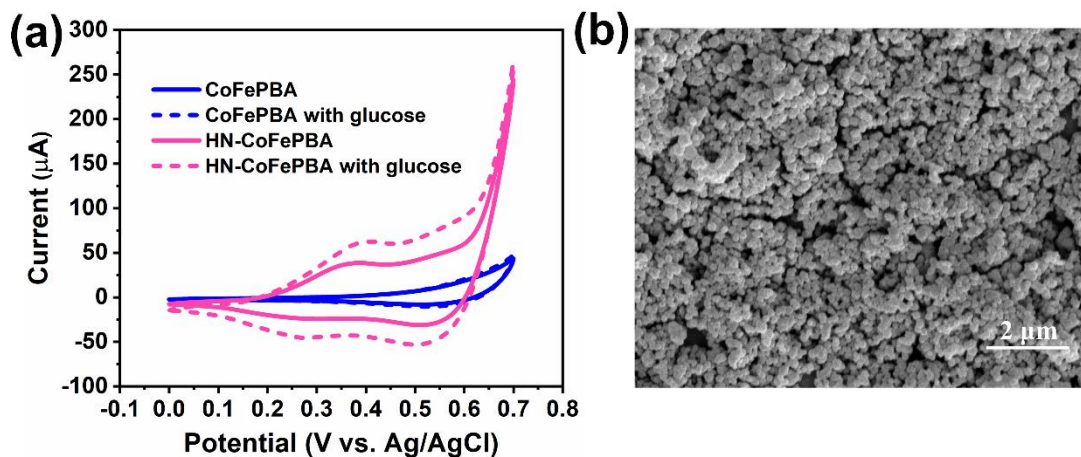

**Fig. S6** (a) CV curves of CoFePBA, HN-CoFePBA of 20  $\mu\text{M}$  glucose in 0.1 M NaOH solution at 20  $\text{mV s}^{-1}$ . (b) SEM image of CoFePBA nanoparticles.

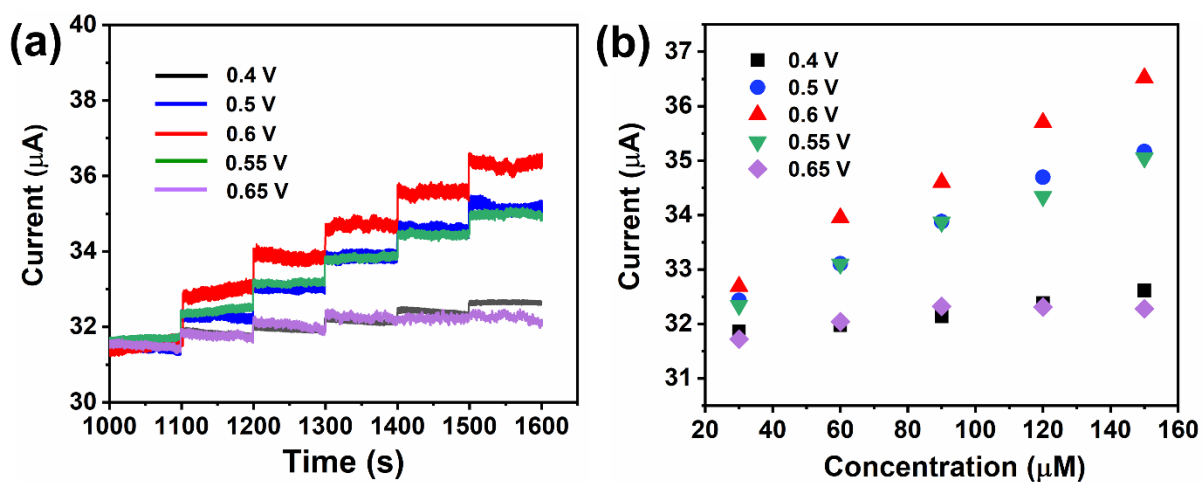

**Fig. S7** (a) Chronoamperometric response of 0.05 HN-CoFePBA under different applied potentials. (b) Plots of peak current vs glucose concentration.

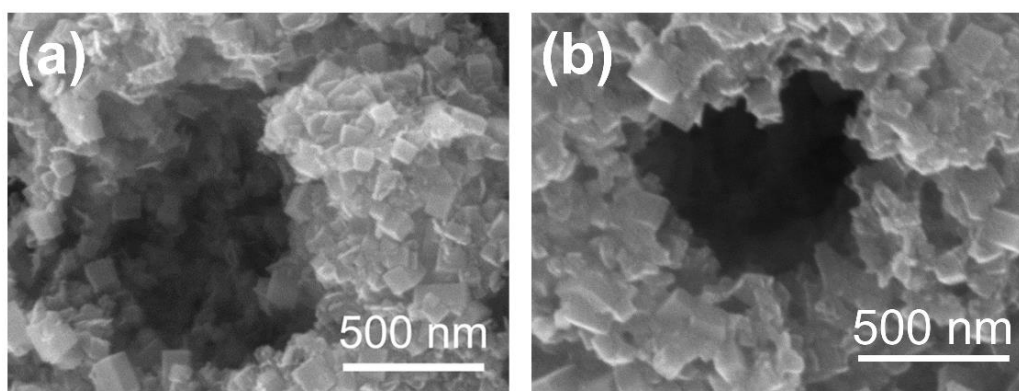

**Fig. S8** (a) SEM of 0.05 HN-CoFePBA, (b) SEM of 0.05 HN-CoFePBA after stability test.

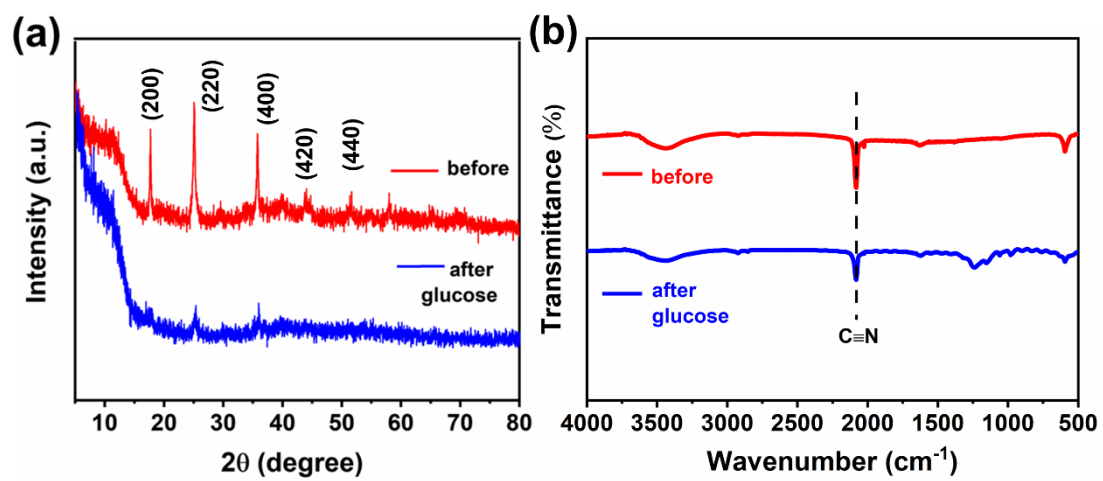

**Fig. S9** (a) XRD of 0.05 HN-CoFePBA. (b) FT-IR of 0.05 HN-CoFePBA after stability test.
